# Supplementary material for: Use of Objective Outcomes Measures to Verify the Effects of ICF-Based Gait Treatment in Huntington's Disease Patient on Globus Pallidus Deep Brain Stimulation: A Case Report
Source: Frontiers journal article supplement (doi:10.3389/fresc.2022.849333), 2022-04-14
Supplement: Data_Sheet_1.pdf [file Data_Sheet_1.pdf]

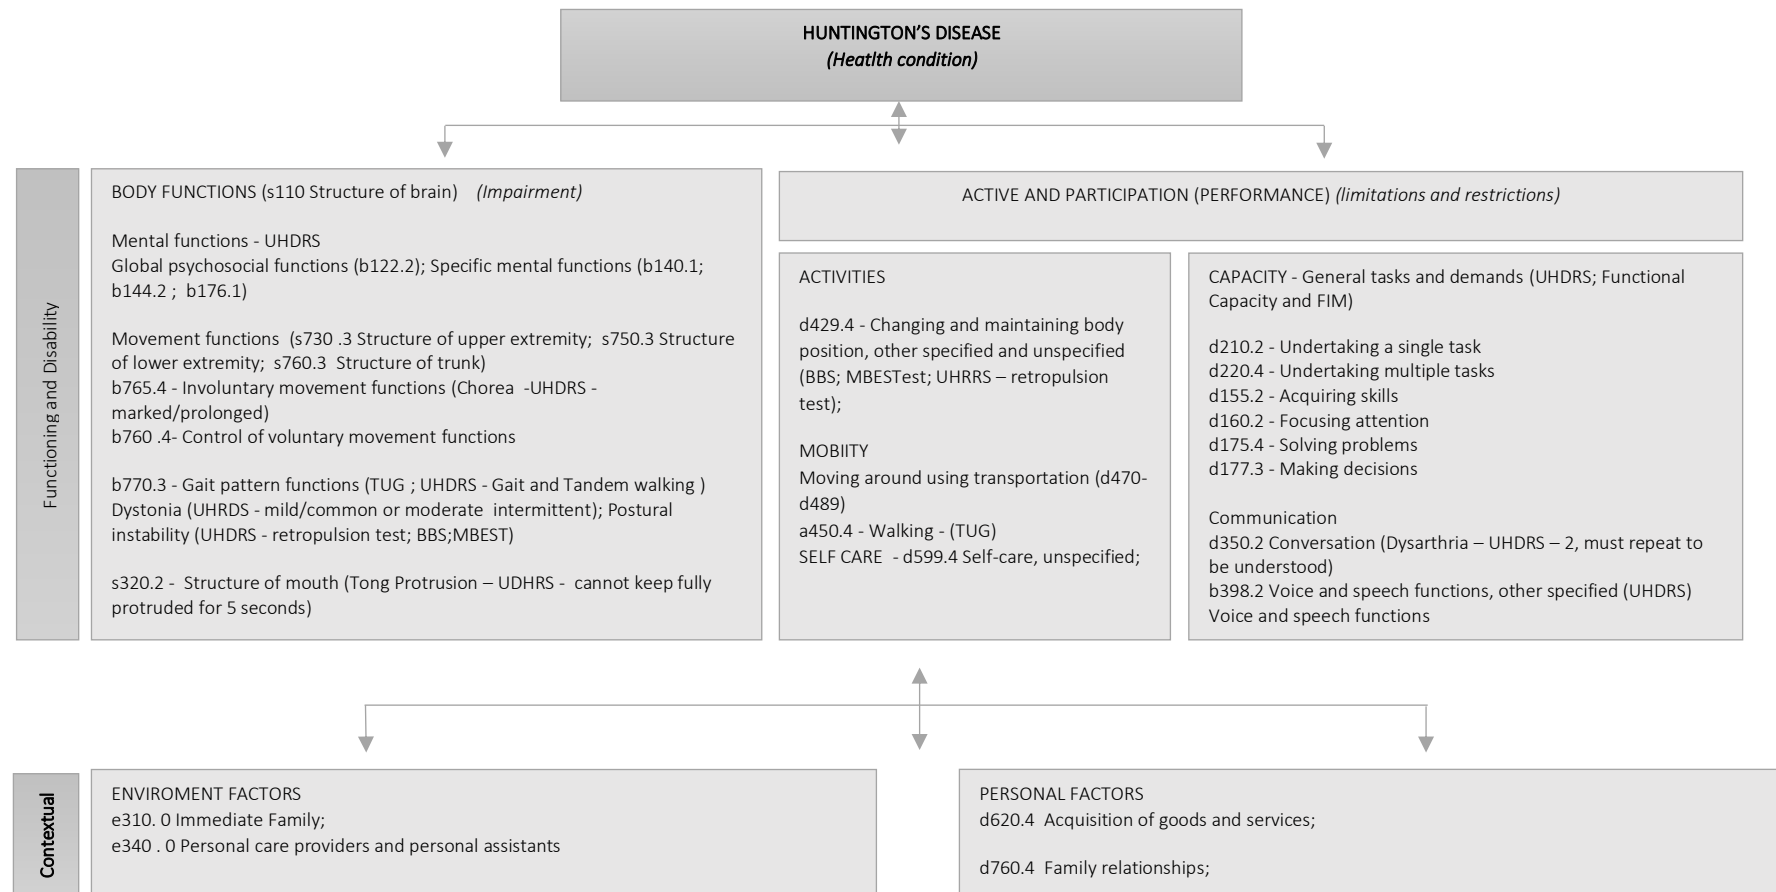

**Figure 1: Huntington's Disease assessment model ICF-based and outcomes measures used to assess the different domains including codes descriptors and qualifiers**
